# Supplementary material for: Inexpensive water soluble methyl methacrylate-functionalized hydroxyphthalimide: variations of the mycophenolic acid core for selective live cell imaging of free cysteine
Source: Royal Society of Chemistry journal article supplement (doi:10.1039/d0an02185g), 2021-01-01
Supplement: d0an02185g1.pdf [file d0an02185g1.pdf]

## SUPPORTING INFORMATION

### **Inexpensive water soluble methyl methacrylate-functionalized hydroxyphthalimide: variations of the mycophenolic acid core for selective live cell imaging of free cysteine**

Woohyun Lee,<sup>[a]</sup> Tesla Yudhistira,<sup>[a]</sup> Wongu Youn,<sup>[b]</sup> Sol Han,<sup>[b]</sup> Mahesh B. Halle,<sup>[a]</sup> Jae Hyuck Choi,<sup>[a]</sup> Youngsam Kim,<sup>[e]</sup> Insung S. Choi<sup>\*,[b]</sup> and David G. Churchill<sup>\*,[a],[c],[d]</sup>

- a. *Molecular Logic Gate Laboratory, Department of Chemistry, Korea Advanced Institute of Science and Technology (KAIST), Daejeon, 34141, Republic of Korea. E-mail: [dchurchill@kaist.ac.kr](mailto:dchurchill@kaist.ac.kr).*
- b. *Department of Chemistry, Center for Cell-Encapsulation Research, KAIST, Daejeon 34141, Republic of Korea.*
- c. *Center for Catalytic Hydrocarbon Functionalizations, Institute for Basic Science (IBS), Daejeon, 34141, Republic of Korea.*
- d. *KI for Health Science and Technology, KI Institute, Korea Advanced Institute of Science and Technology (KAIST), Daejeon, 34141, Republic of Korea.*
- e. *Korea Institute of Science and Technology (KIST), Stuhlsatzenhausweg 97, 66123 Saarbrücken, Germany.*

## Contents

|                                                                                         |     |
|-----------------------------------------------------------------------------------------|-----|
| <sup>1</sup> H and <sup>13</sup> C NMR Spectrum of <b>Myco-OH</b> and <b>Myco-Cys</b> . | S3  |
| FT-IR Spectrum of <b>Myco-OH</b> and <b>Myco-Cys</b> .                                  | S9  |
| ESI-MS Spectrum of <b>Myco-Cys</b> .                                                    | S11 |
| Emission Spectra of <b>Myco-Cys</b> after the reaction with various amino acids.        | S12 |
| Calculations of limit of detection.                                                     | S13 |
| Interference Study with various metal ions.                                             | S13 |
| DFT-optimized geometries of <b>Myco-OH</b> and <b>Myco-Cys</b> .                        | S14 |
| HOMO-LUMO of DFT-optimized geometries of <b>Myco-Cys</b> and <b>Myco-OH</b> .           | S15 |
| Mechanism study of the reaction between <b>Myco-Cys</b> and cysteine                    | S16 |
| Cell viability study.                                                                   | S19 |
| Tables S1-S3.                                                                           | S20 |

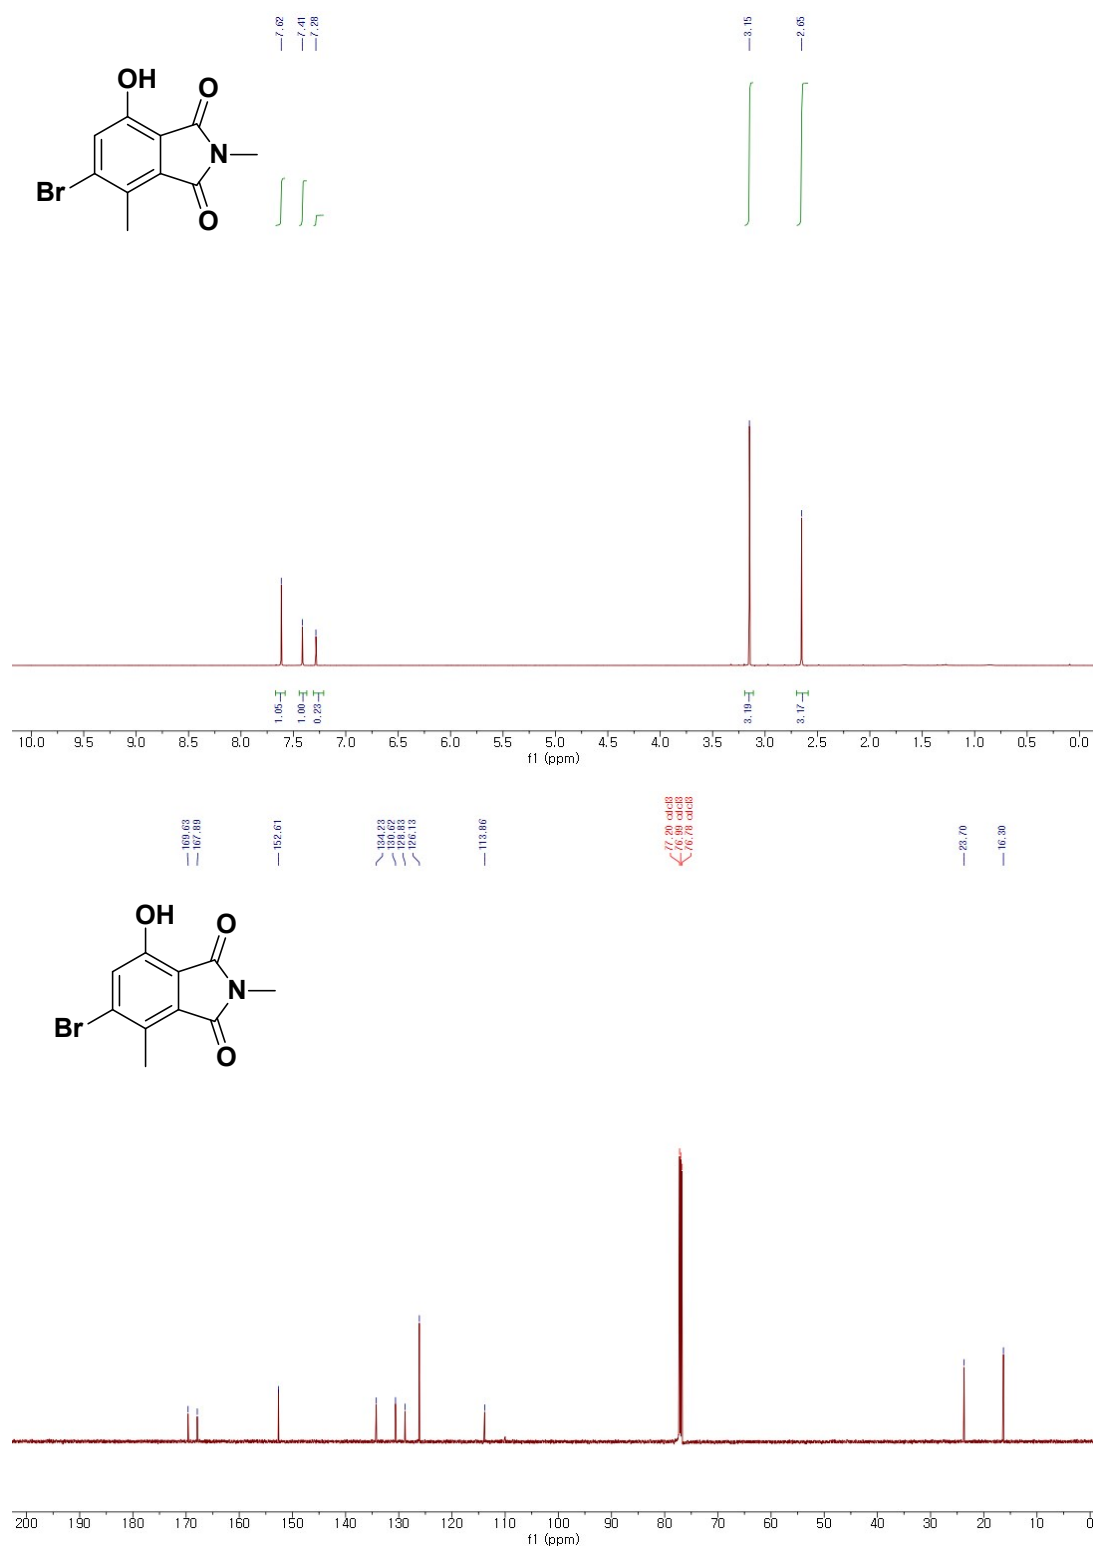

**Fig. S1.** (top)  $^1\text{H}$  and (bottom)  $^{13}\text{C}$  NMR spectrum of compound **Myco-OH**.

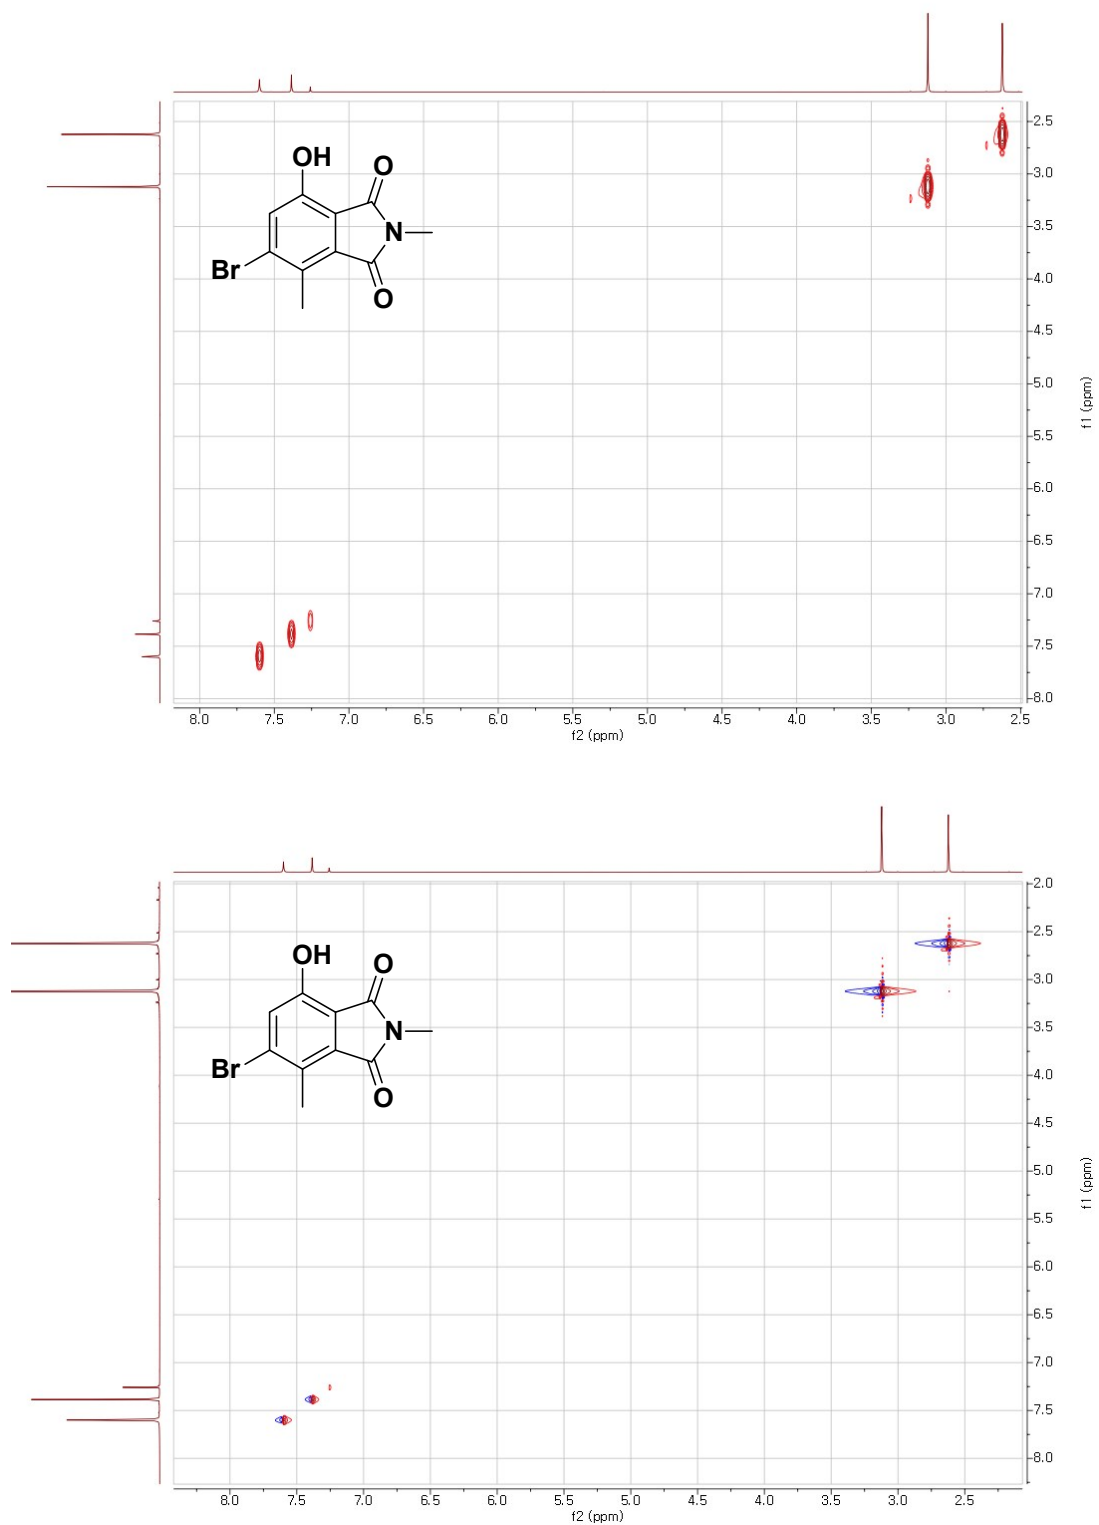

**Fig. S2.** (*top*) COSY and (*bottom*) NOESY NMR spectrum of compound **Myco-OH**.

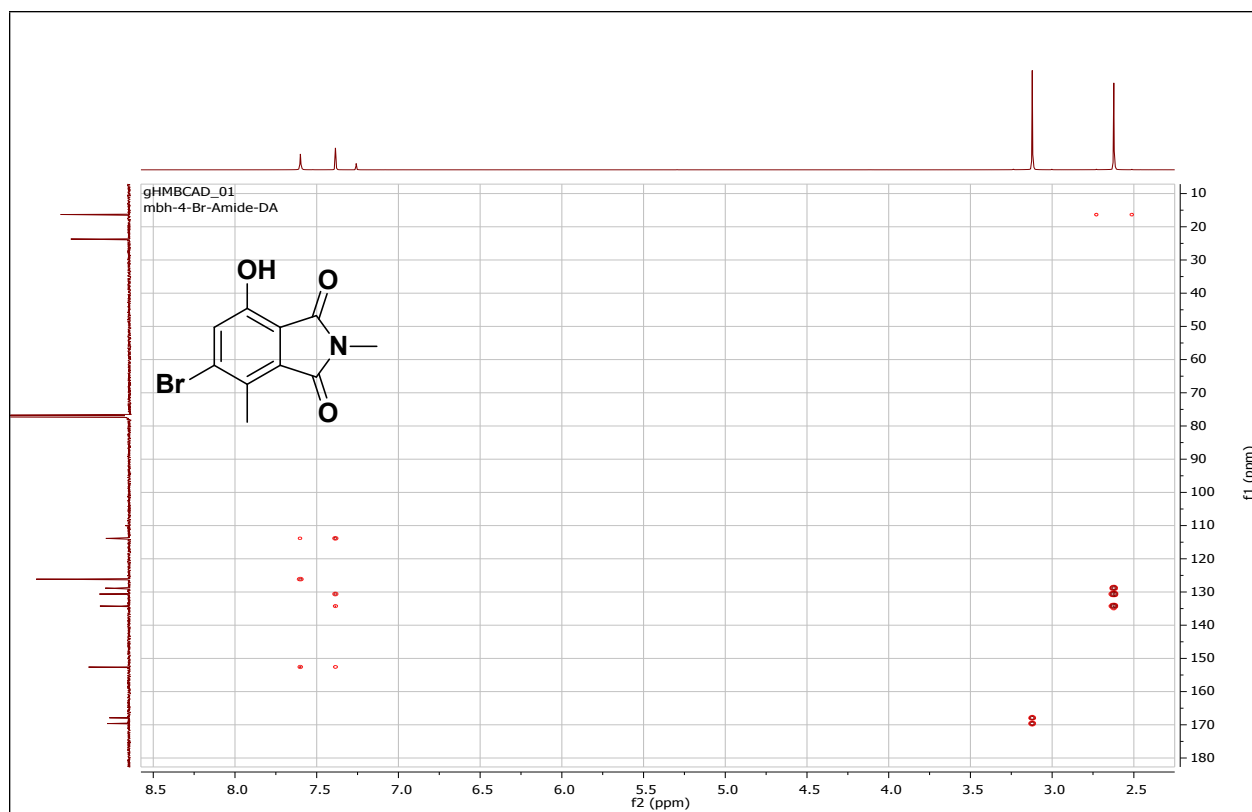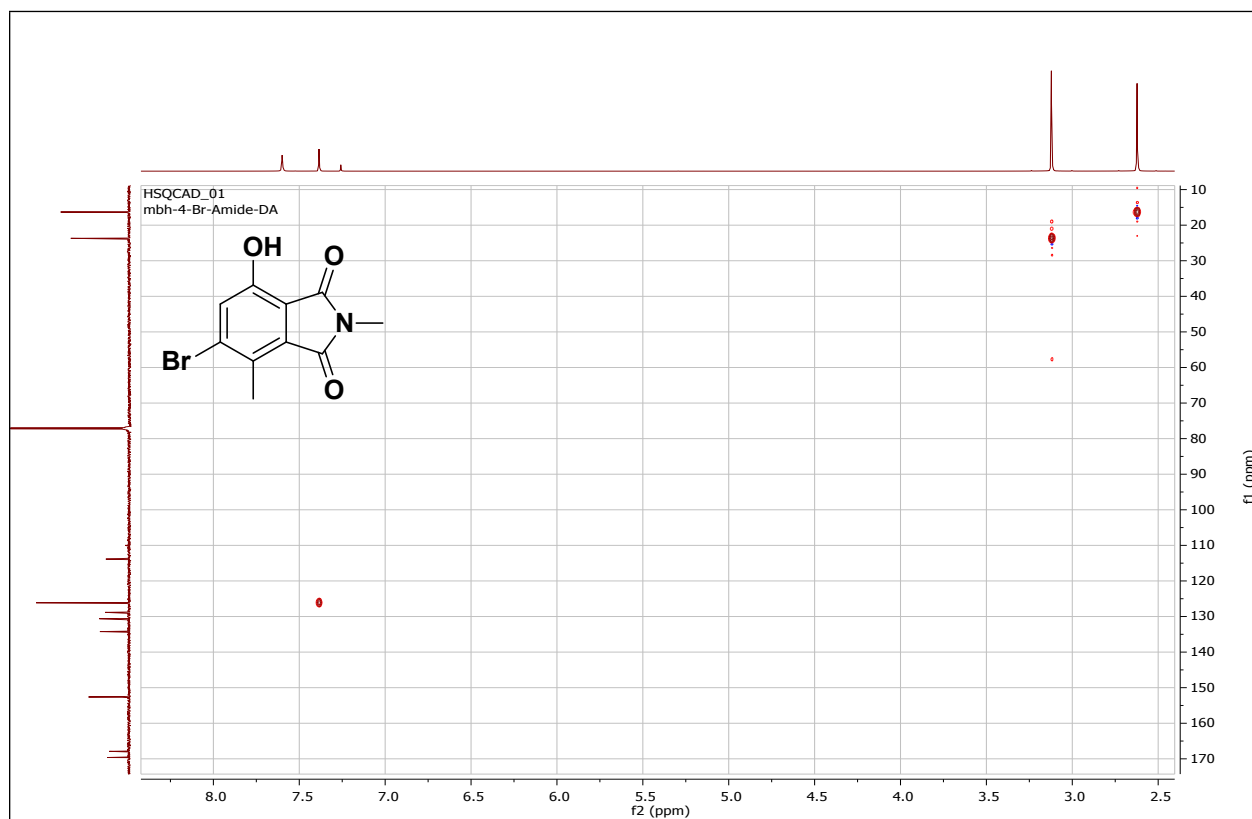

**Fig. S3.** (top) HMBC and (bottom) HSQC NMR spectrum of compound **Myco-OH**.

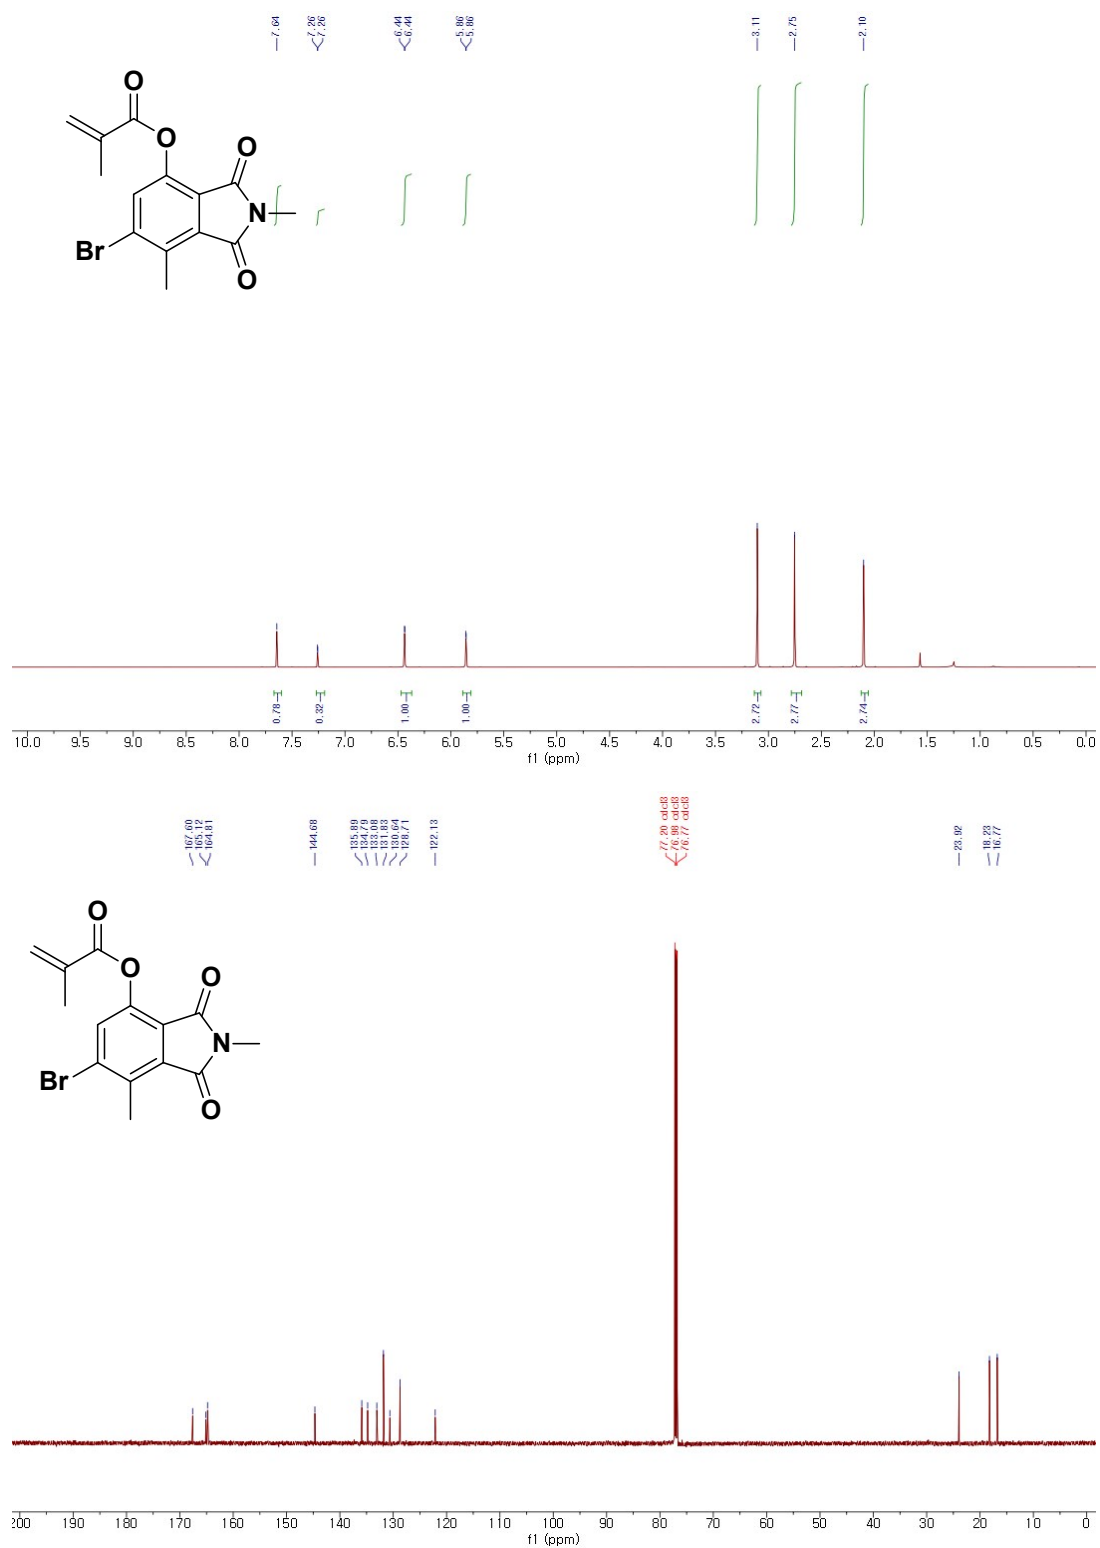

**Fig. S4.** (top) <sup>1</sup>H and (bottom) <sup>13</sup>C NMR spectrum of compound **Myco-Cys**.

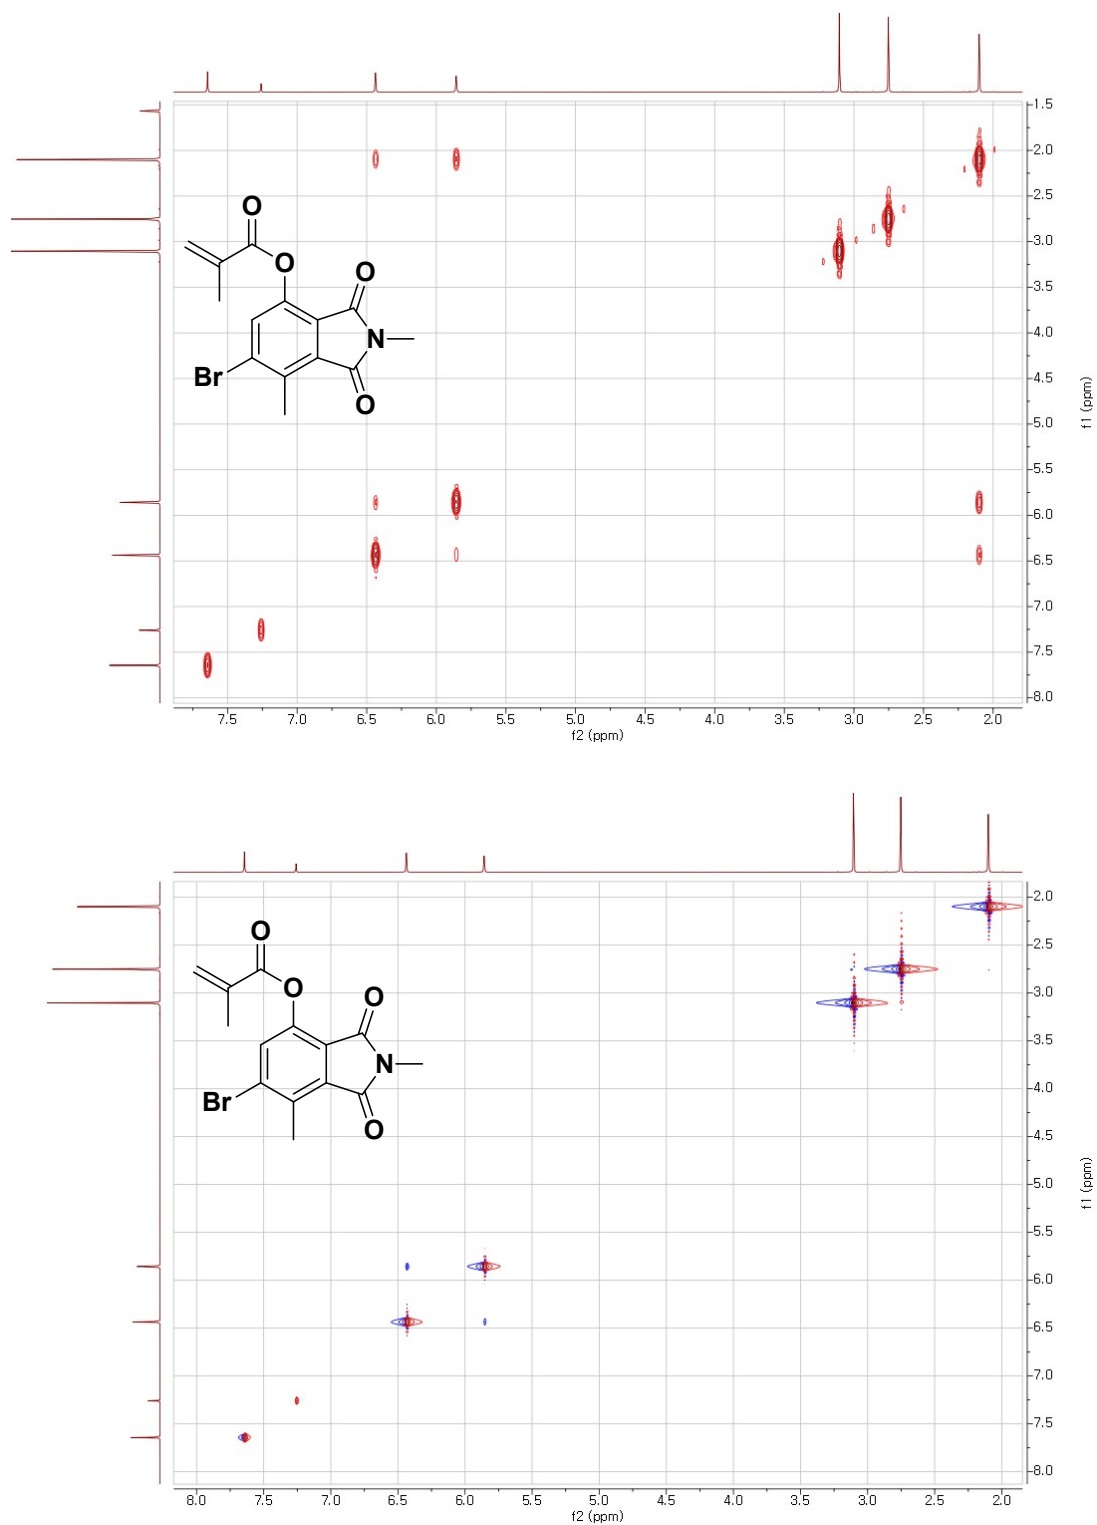

**Fig. S5.** (*top*) COSY and (*bottom*) NOESY NMR spectrum of compound **Myco-Cys**.

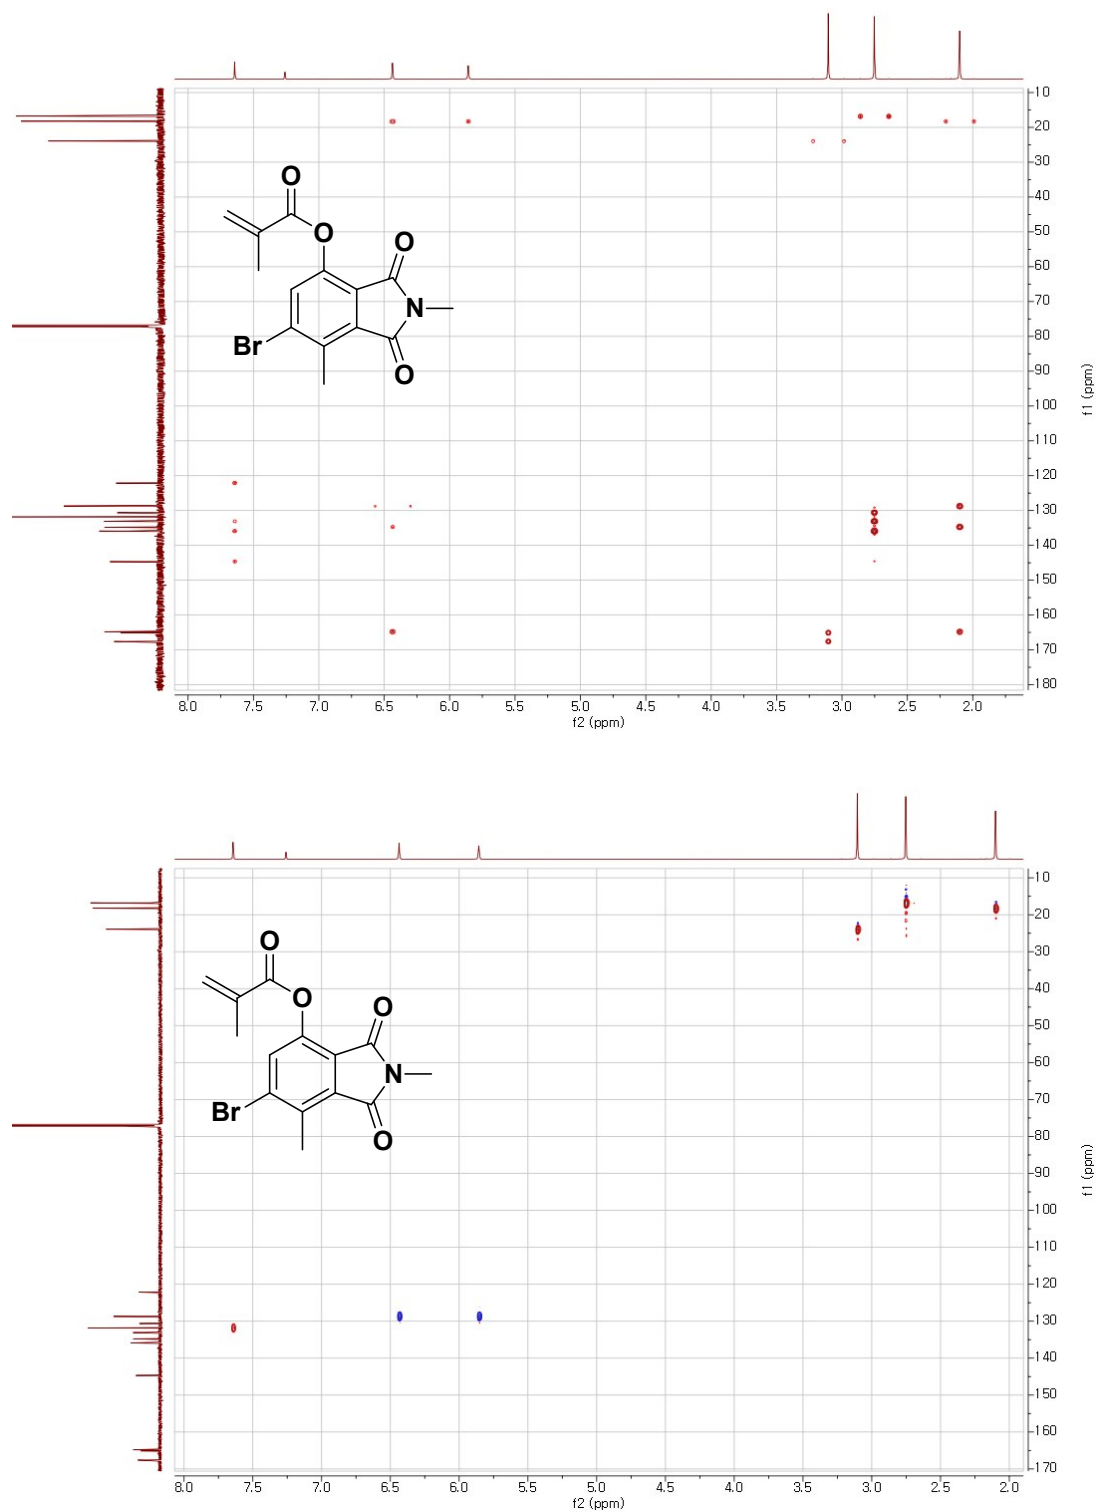

**Fig. S6.** (*top*) HMBC and (*bottom*) HSQC NMR spectrum of compound **Myco-Cys**.



**Fig. S7.** FT-IR spectrum of **Myco-OH**.

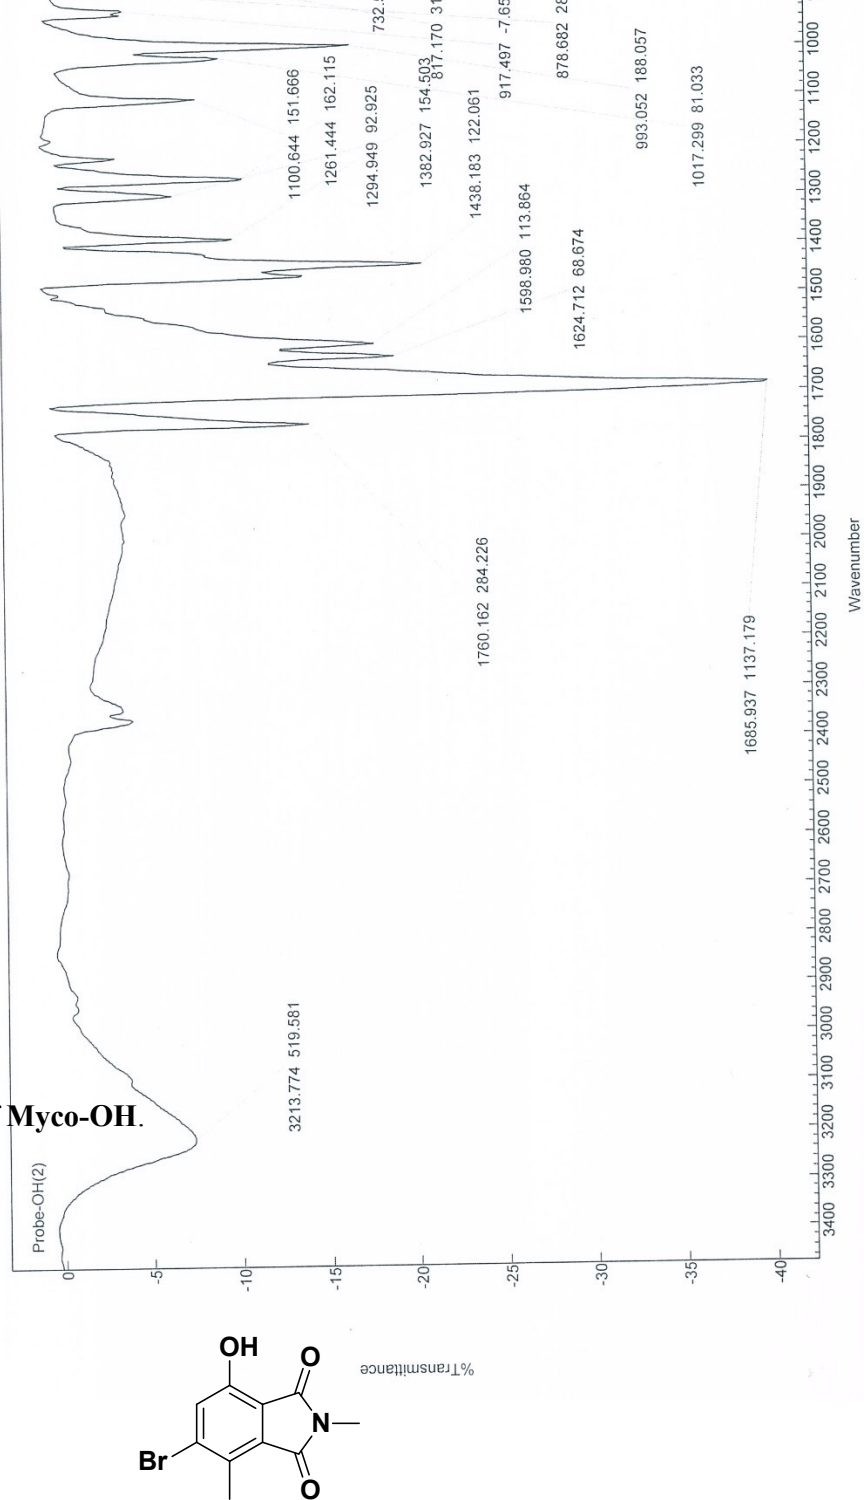

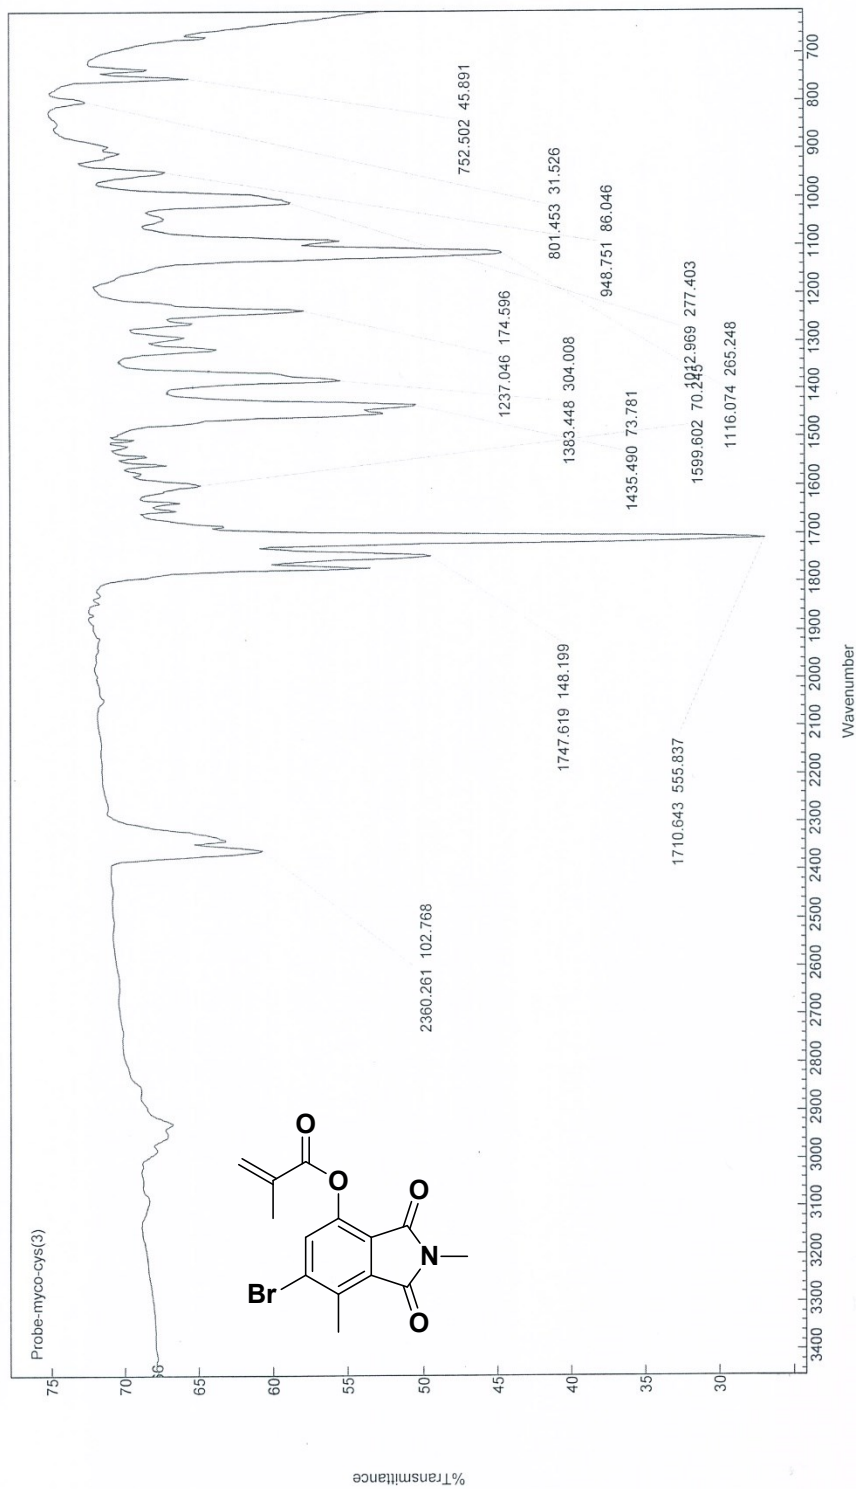

**Fig. S8.** FT-IR spectrum of Myco-Cys.

# Generic Display and Mass Spectrum List Report

## Analysis Info

Analysis Name D:\Data\2019\01\0131\LWH\sample.d  
 Method NaFormate\_pos\_50\_700mz\_180830.m  
 Sample Name  
 Comment

Operator BDAL@KR  
 Instrument micrOTOF-Q

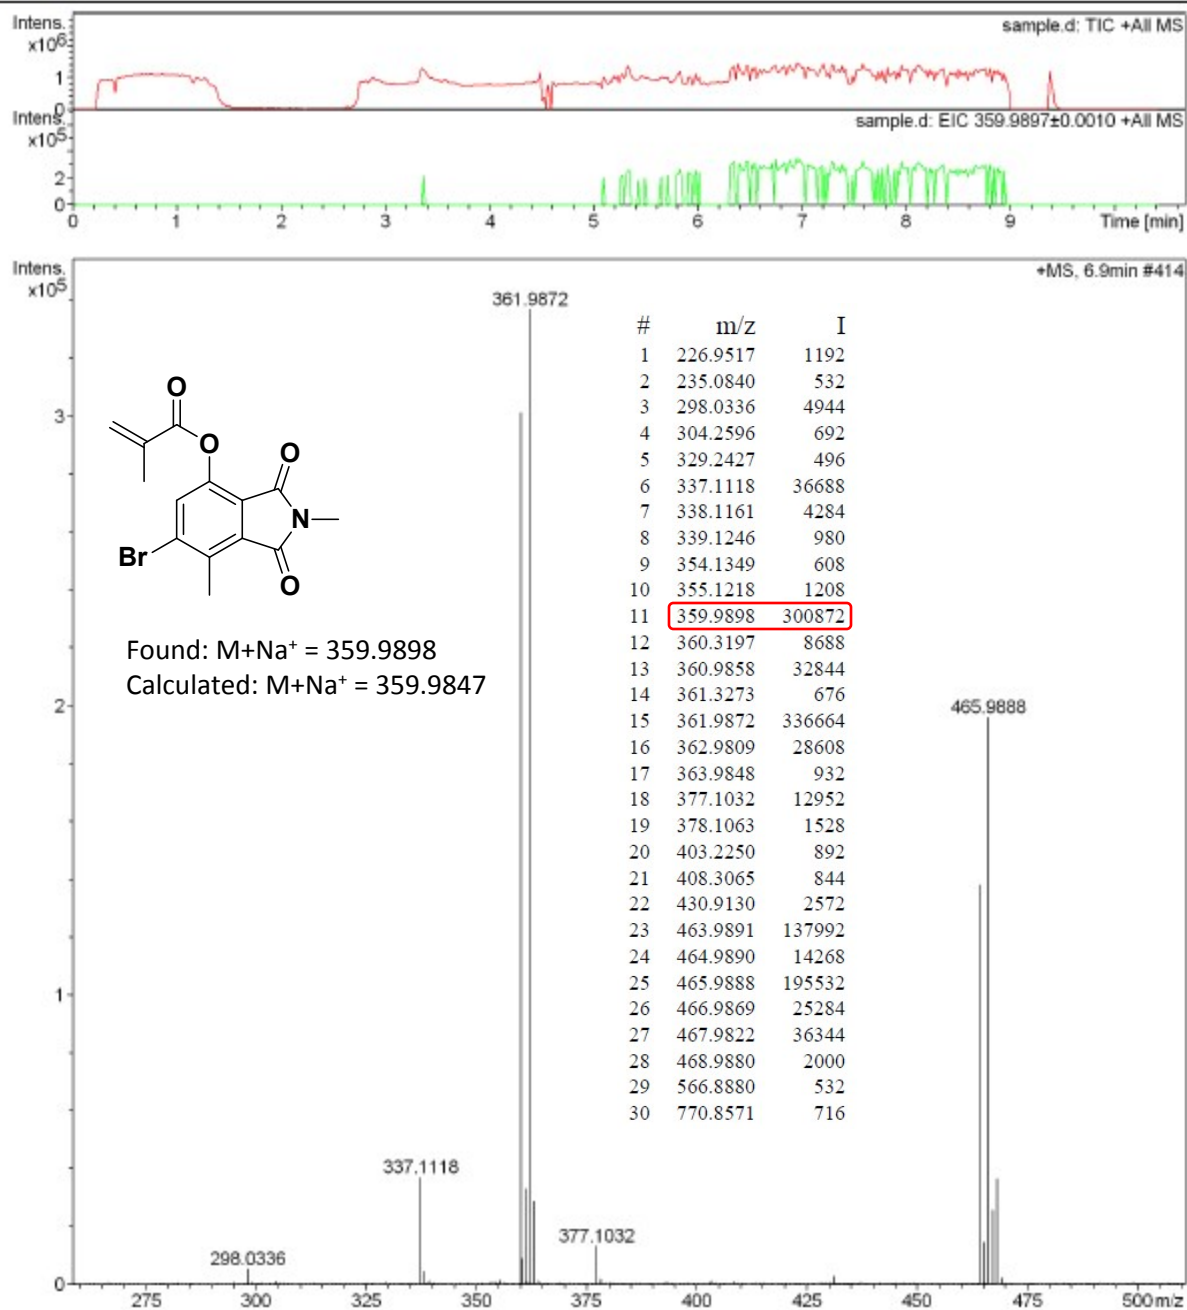

**Fig. S9.** ESI-MS spectrum of Myco-Cys

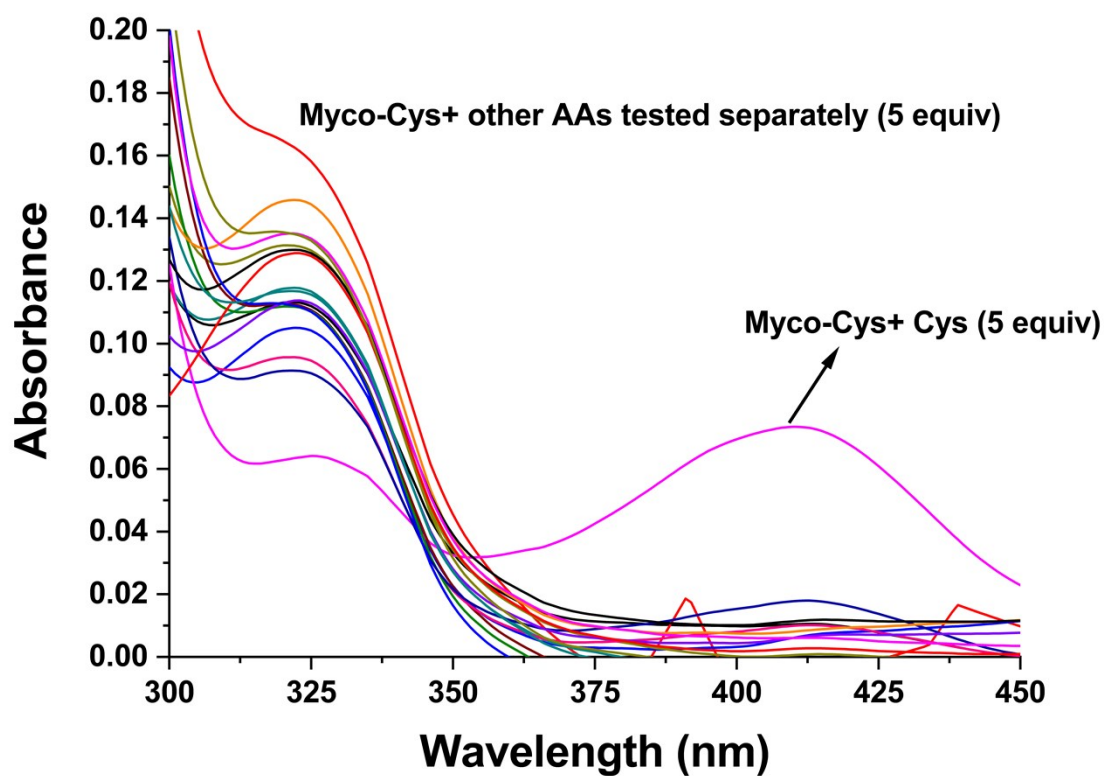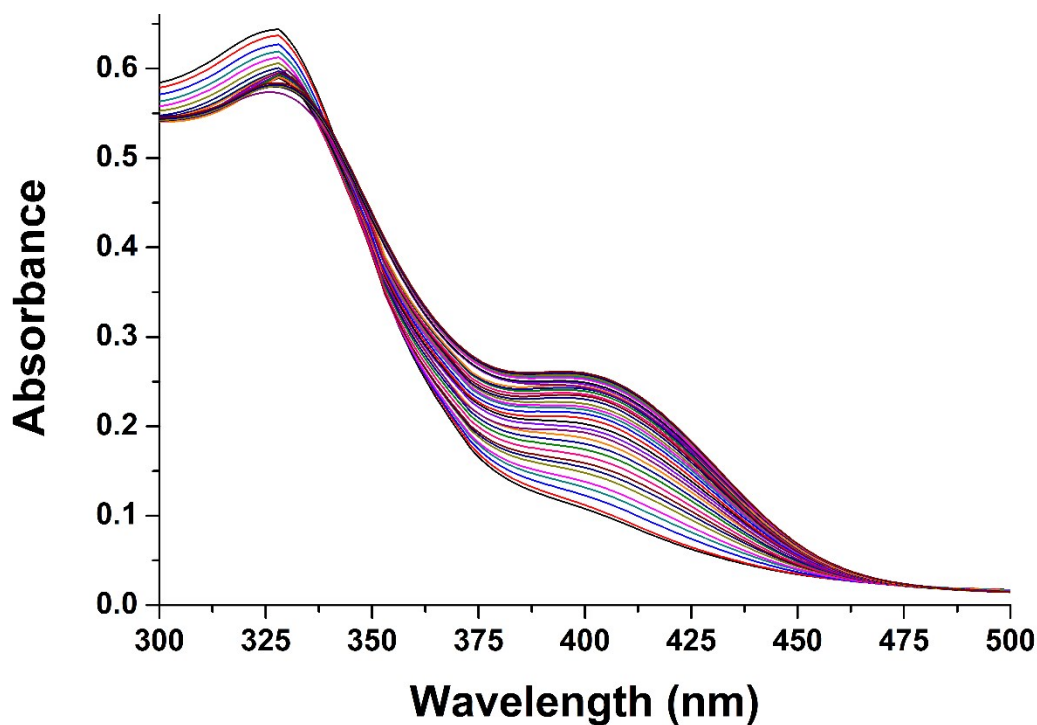

**Fig. S10.** (top) Comparison of UV-vis absorption spectra **Myco-Cys**+Cys (5 equiv) and **Myco-Cys**+other AAs (5 equiv); (bottom) Time dependent UV-vis absorption spectrum between **Myco-Cys**+Cys (5 equiv); incubation time 3600 seconds (Data was taken every 1 minute).

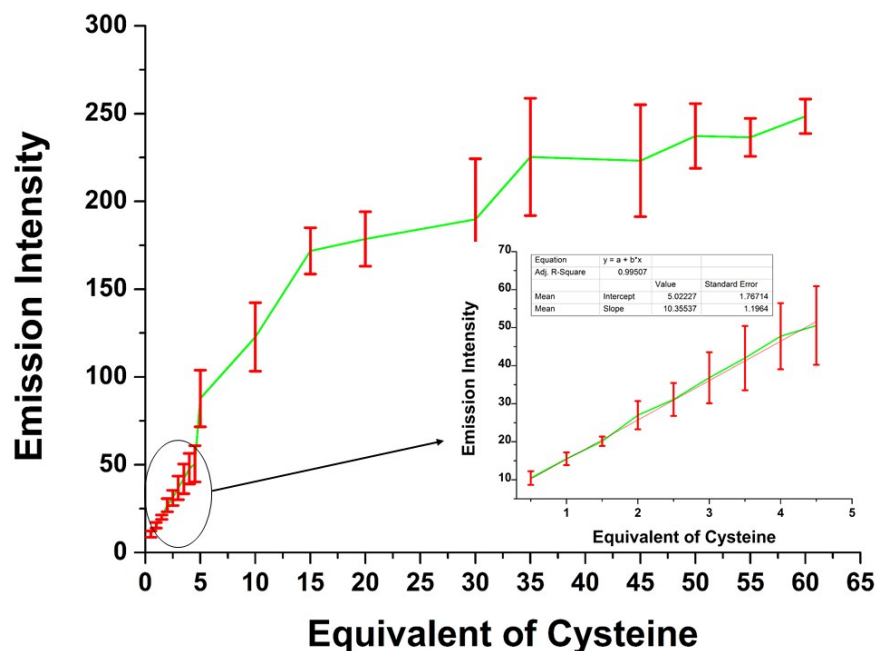

**Fig. S11.** Plot for the calculation of the limit of detection from the emission of **Myco-Cys** (10.0  $\mu\text{M}$ ) in the solution of PBS (pH 7.4); incubated for 30 minutes with increasing concentration of Cys (0.0 to 55.0 equiv)  $\lambda_{\text{ex}}$  = 417 nm and  $\lambda_{\text{em}}$  = 517 nm; slit width (3 nm/3 nm) at rt (error bars are reflecting error based on taking the average three experiments).

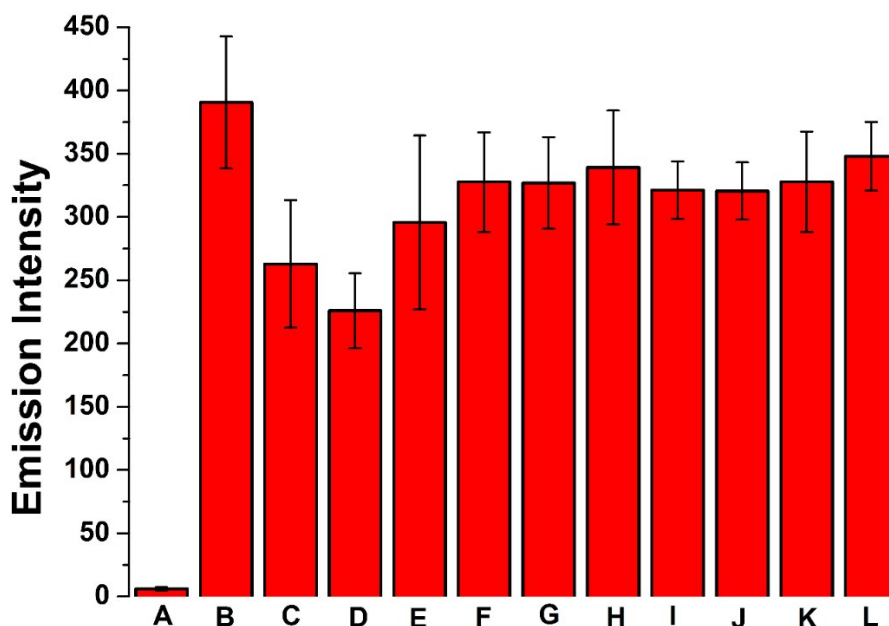

**Fig. S12.** Interference study of **Myco-Cys** (10  $\mu\text{M}$ ) with various soluble metal ions in a PBS solution (10 mM, pH 7.4); A: **Myco-Cys**; B: **Myco-Cys**+Cys; C: **Myco-Cys**+Cys+Cd; D: **Myco-Cys**+Cys+Co; E: **Myco-Cys**+Cys+Cs; F: **Myco-Cys**+Cys+Cu; G: **Myco-Cys**+Cys+Fe(II); H: **Myco-Cys**+Cys+Fe(III); I: **Myco-Cys**+Cys+Li; J: **Myco-Cys**+Cys+Mg; K: **Myco-Cys**+Cys+Mn; L: **Myco-Cys**+Cys+Pb; incubated for 30 min;  $\lambda_{\text{ex}}$  = 417 nm and  $\lambda_{\text{em}}$  = 519 nm; slit width (3 nm/3 nm); (bottom) at rt (error bars are the average three experiments).

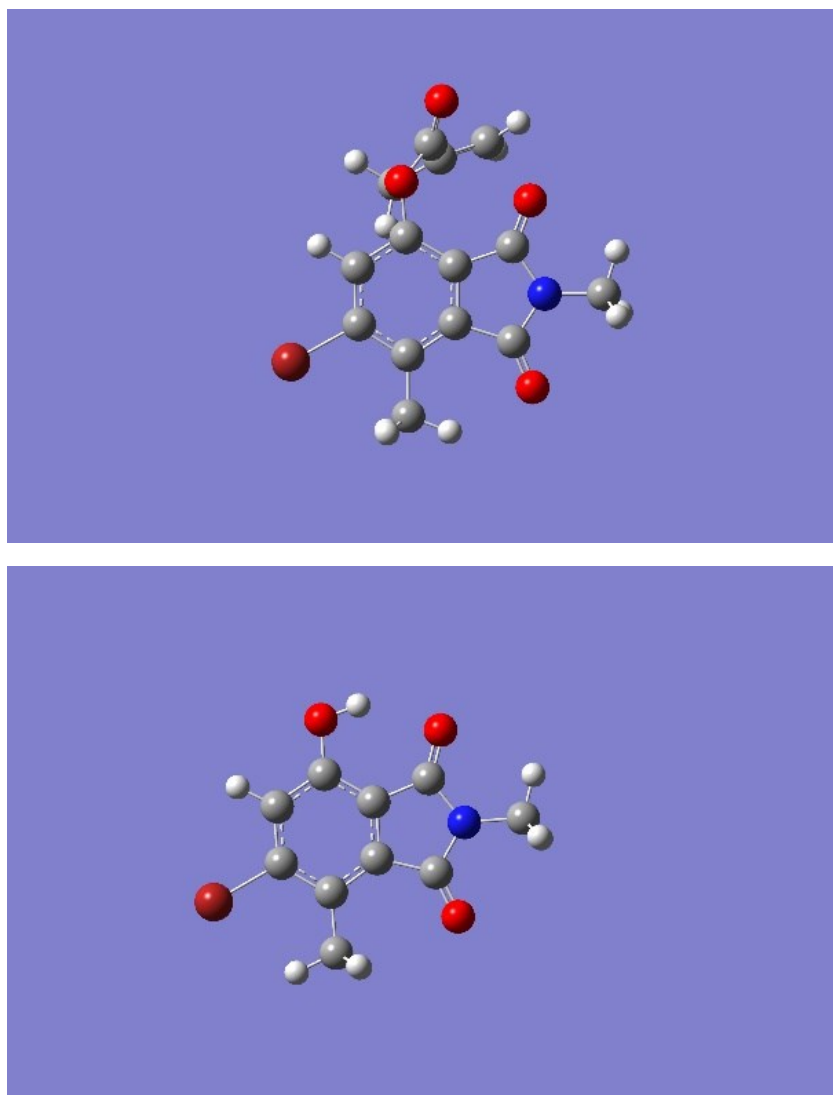

**Fig. S13.** DFT-optimized geometries of **Myco-Cys** (top), and **Myco-OH**(bottom) (B3LYP/6-31g\* basis set, G09).

|        | Cys Probe | Fluorophore core |
|--------|-----------|------------------|
| LUMO+1 |           |                  |
| LUMO   |           |                  |
| HOMO   |           |                  |
| HOMO-1 |           |                  |

**Fig. S14.** HOMO-LUMO of DFT-optimized geometries of **Myco-Cys** and **Myco-OH**(B3LYP/6-31g\* basis set and 6-311g\* only for Se, G09).



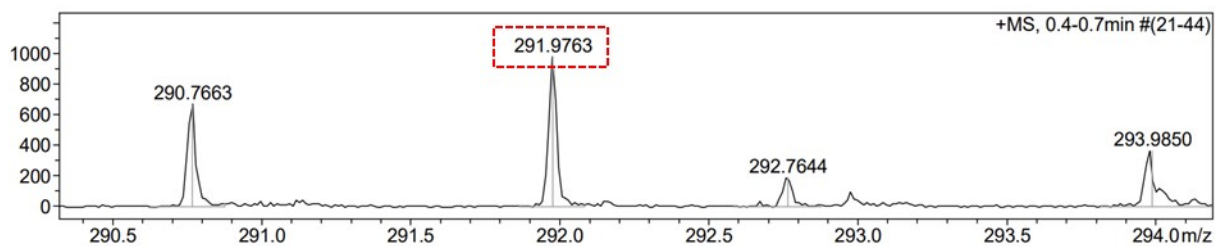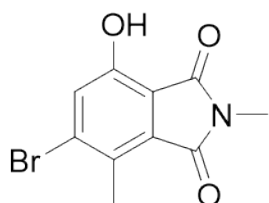

Found:  $M+Na^+ = 291.9580$

Calculated:  $M+Na^+ = 291.9763$

**Fig. S15.** ESI-MS spectrum of the reaction product of **Myco-Cys** and cysteine.

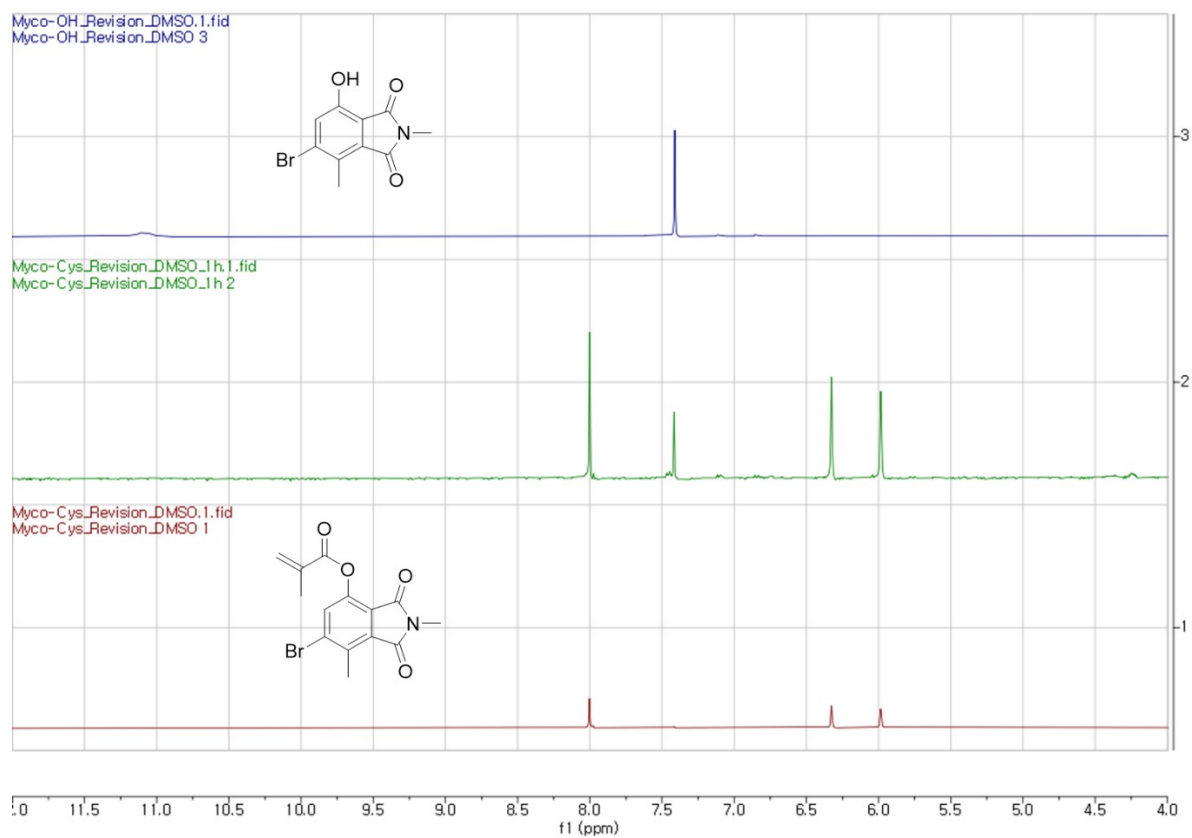

**Fig. S16.**  $^1H$  NMR spectrum of **Myco-OH**, **Myco-Cys+cysteine**, **Myco-Cys** in  $DMSO-d_6$ .



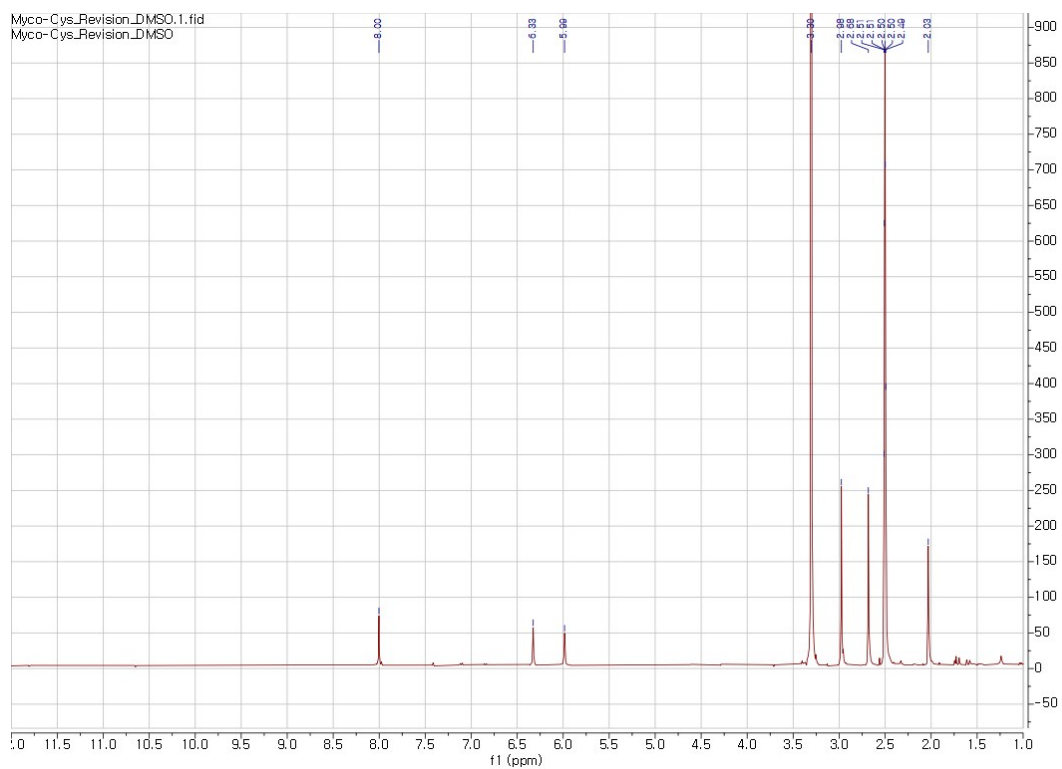

**Fig. S17.**  $^1\text{H}$  NMR spectrum of **Myco-Cys** in DMSO- $d_6$ .

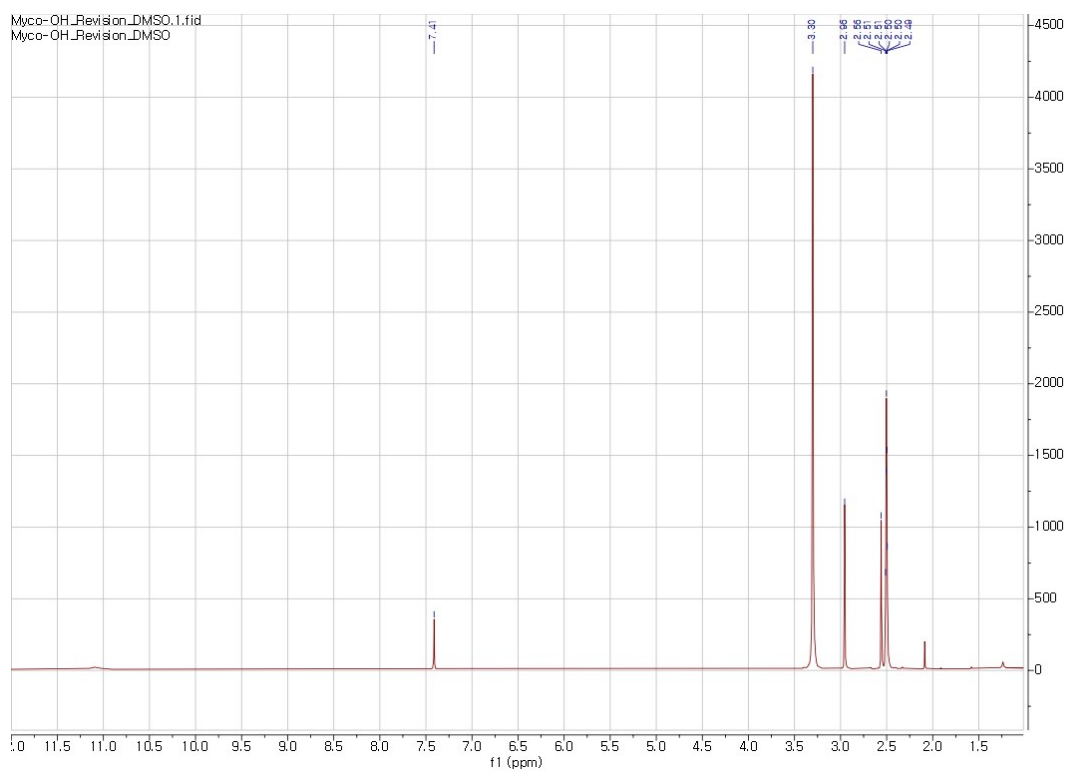

**Fig. S18.**  $^1\text{H}$  NMR spectrum of **Myco-OH** in DMSO- $d_6$ .

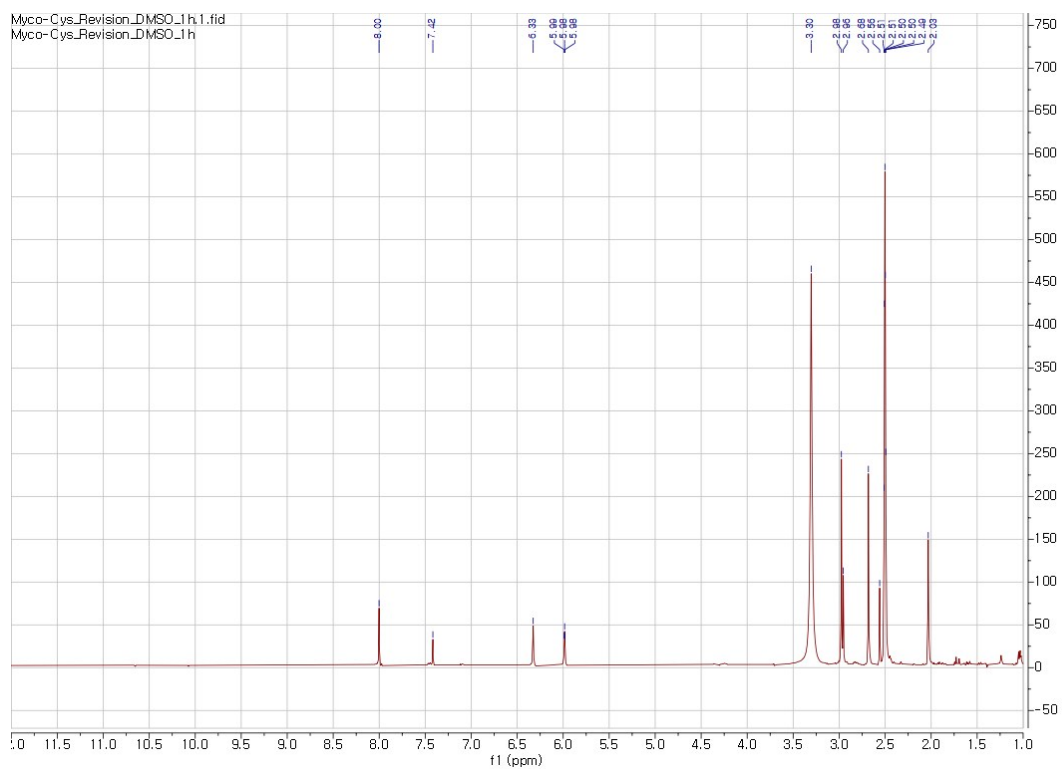

**Fig. S19.**  $^1\text{H}$  NMR spectrum of **Myco-Cys**+cysteine in DMSO- $\text{d}_6$ .

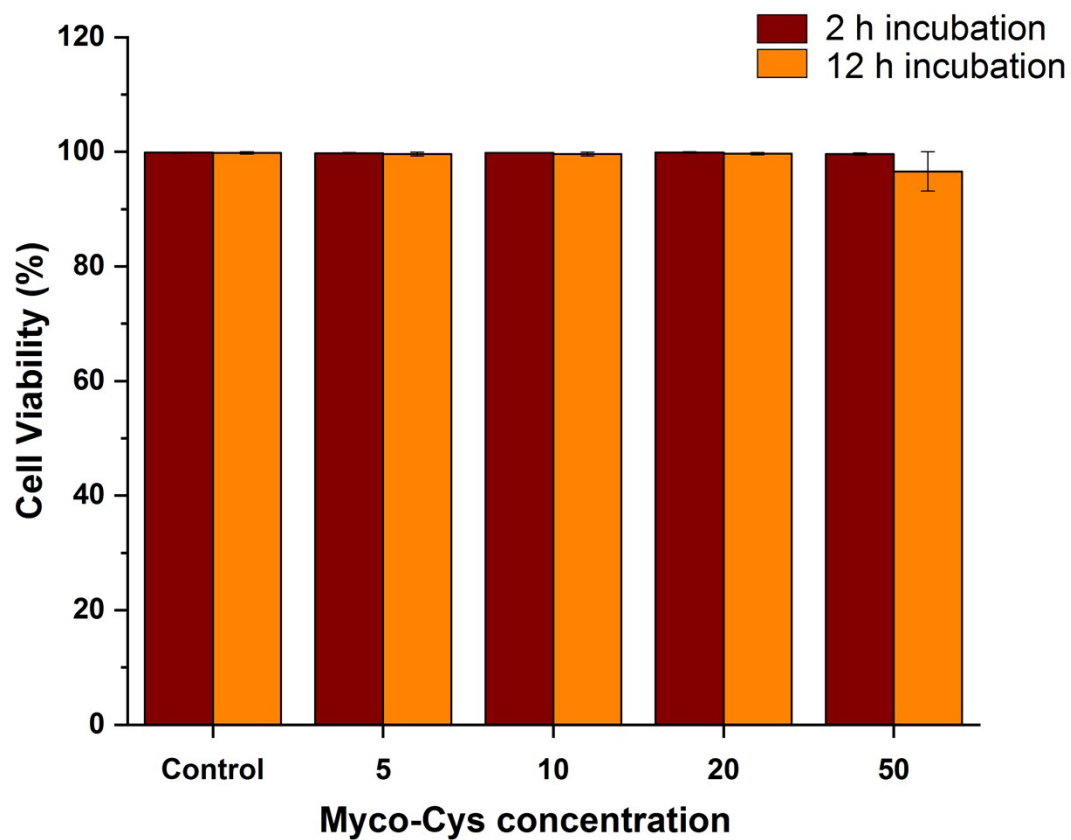

**Fig. S20.** Concentration-dependent cell viability assays with LIVE/DEAD<sup>®</sup> viability/cytotoxicity kit. A549 cells were incubated with various concentrations (0, 5, 10, 20, 50  $\mu\text{M}$ ) of **Myco-Cys** for 2 h and 12 h.

|                 | $f$           | Composition                                 | CI(%)       |
|-----------------|---------------|---------------------------------------------|-------------|
| <b>Myco-Cys</b> | <b>0.0629</b> | HOMO-1 $\rightarrow$ LUMO                   | 13.1        |
|                 |               | <b>HOMO <math>\rightarrow</math> LUMO</b>   | <b>76.6</b> |
|                 | 0.0207        | <b>HOMO-1 <math>\rightarrow</math> LUMO</b> | <b>69.6</b> |
|                 |               | HOMO $\rightarrow$ LUMO                     | 9.73        |
| <b>Myco-OH</b>  | <b>0.1164</b> | <b>HOMO <math>\rightarrow</math> LUMO</b>   | <b>87.8</b> |

**Table S1.** Absorption energies with largest oscillator strength for **Myco-Cys** and **Myco-OH** (B3LYP/6-31g\* basis set and 6-311g\* only for Se, G09)

| <b>C<sub>1</sub></b> | <b>V</b> | <b>A</b>                   | <b><math>\bar{A}</math></b> | <b>C<sub>2</sub></b>  | <b>P</b> | <b>Log P</b> |
|----------------------|----------|----------------------------|-----------------------------|-----------------------|----------|--------------|
| $1.3 \times 10^{-5}$ | 3.5      | 0.0399<br>0.0491<br>0.0454 | 0.0415                      | $1.24 \times 10^{-5}$ | 1.89     | 0.276        |
| $1.6 \times 10^{-5}$ | 4.8      | 0.0475<br>0.0429<br>0.0461 | 0.0455                      | $1.36 \times 10^{-5}$ | 6.96     | 0.842        |
| $2.0 \times 10^{-5}$ | 6.0      | 0.0439<br>0.0409<br>0.0440 | 0.0428                      | $1.28 \times 10^{-5}$ | 22.20    | 1.34         |

**Table S2.** Results of experimental determination of log P value by the shake flask method for the **Myco-Cys**

※ C<sub>1</sub> = Concentration (mol L<sup>-1</sup>) of the stock solution in *n*-octanol before partition; V = volume (μL) of stock solution; A = absorbance in buffer solution after the partition ( $\lambda$  = 500 nm);  $\bar{A}$  = arbitrary absorbance in buffer solution after partitioning ( $\lambda$  = 500 nm); C<sub>2</sub> = concentration (mol L<sup>-1</sup>) in buffer solution after partitioning; P = partition coefficient; log P = logarithm of the partition coefficient.

| Properties<br>(NOTE: abbreviation same as<br>website) | Value (Myco-OH) | Value (Myco-Cys) |
|-------------------------------------------------------|-----------------|------------------|
| milogP                                                | 1.77            | 2.52             |
| TPSA                                                  | 59.30           | 65.38            |
| Natom                                                 | 15              | 20               |
| MW                                                    | 270.08          | 338.16           |
| nON                                                   | 4               | 5                |
| nOHNH                                                 | 1               | 0                |
| nviolations                                           | 0               | 0                |
| nrotb                                                 | 0               | 3                |
| volume                                                | 182.98          | 247.22           |

**Table S3.** Information of the **Myco-OH** and **Myco-Cys** calculated through 'molinspiration property engine v2011.04' at the website, <http://www.molinspiration.com>.

References:

1. C. A. Lipinski, F. Lombardo, B. W. Dominy, P. J. Feeney, *Adv. Drug Del. Rev.*, **1997**, 23, 3-25.

--END--
